# Supplementary material
Source: PubMed Central journal article supplement (PMC7087231)
Supplement: 705_2019_4488_MOESM4_ESM.pdf [file 705_2019_4488_MOESM4_ESM.pdf]

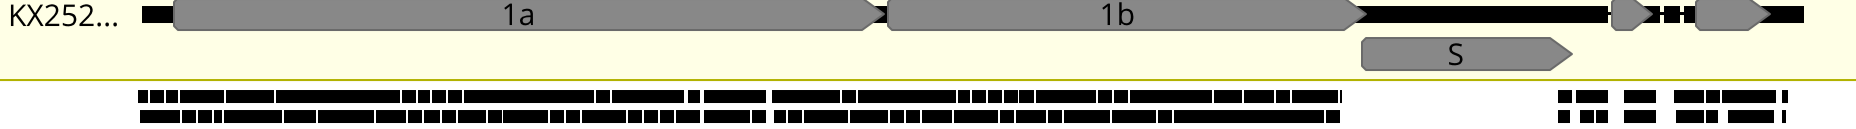

KX252... 1a 1b S

[The main body of the page contains a large amount of extremely faint and illegible text, likely representing a data dump or a corrupted document. The text is organized into several vertical columns, with the most prominent ones on the left and right sides. The content is mostly black on a white background, making it impossible to read.]
