# Supplementary material
Source: PubMed Central journal article supplement (PMC7087231)

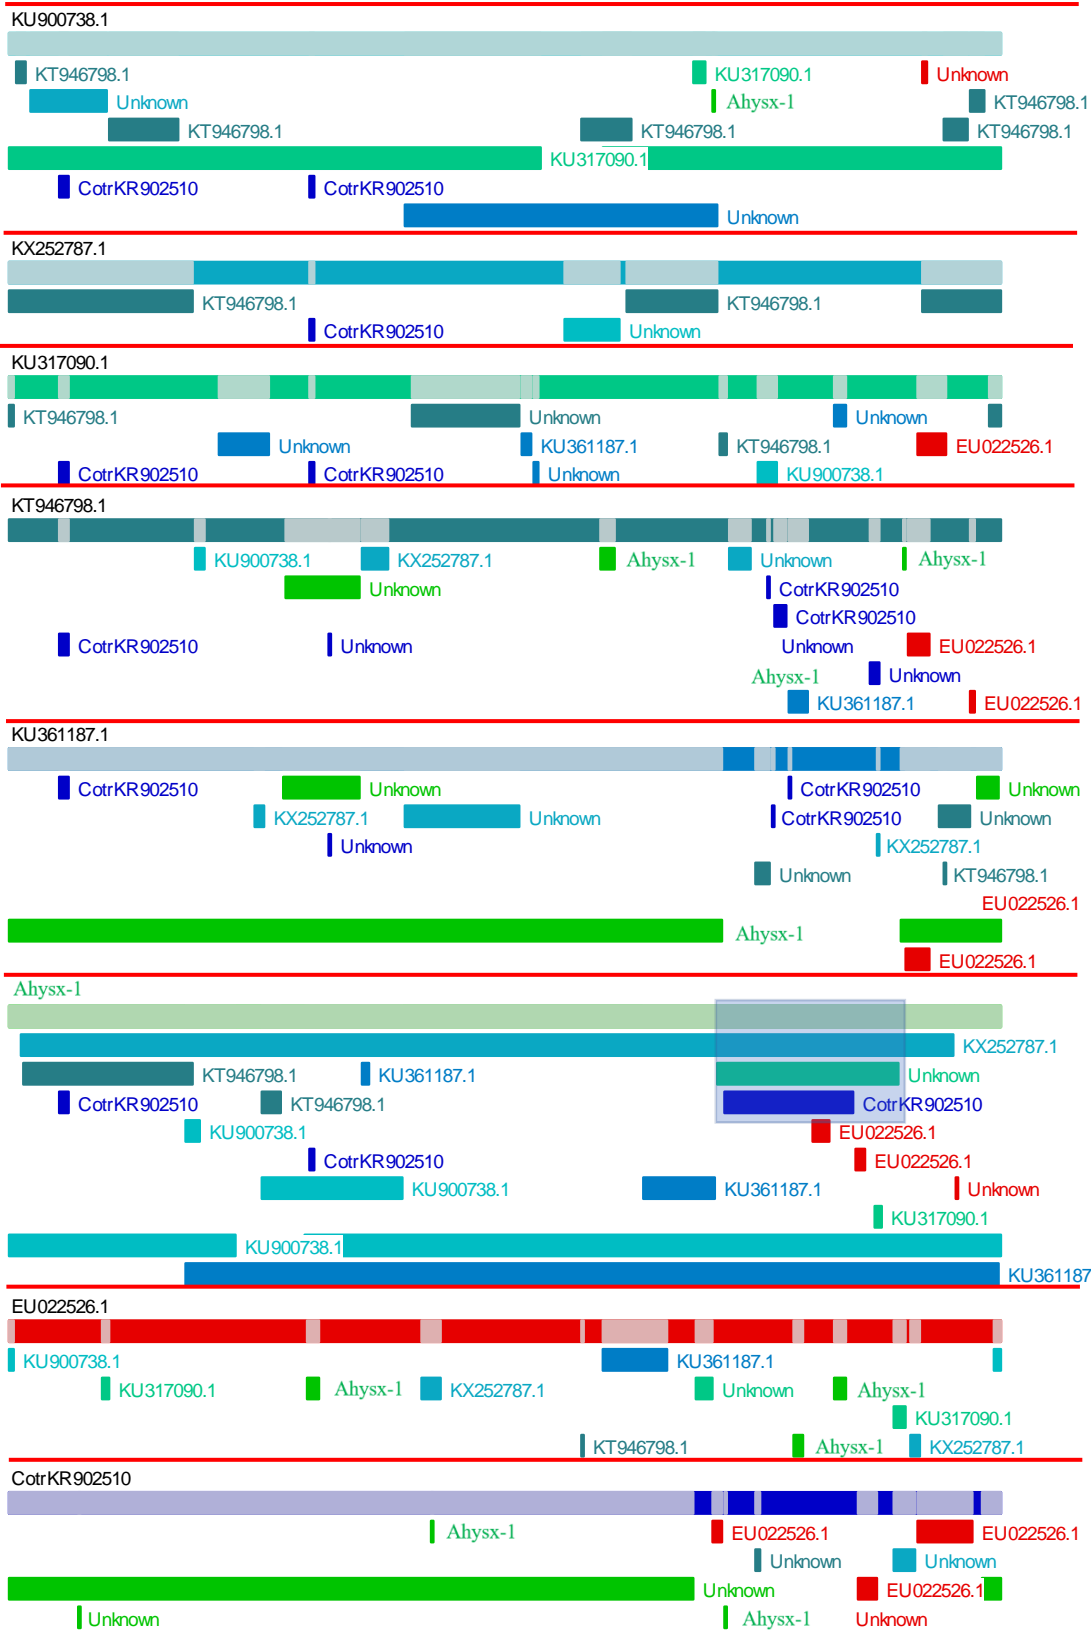

Supplement: 705_2019_4488_MOESM2_ESM.pdf [file 705_2019_4488_MOESM2_ESM.pdf]
